# Supplementary material
Source: ML conference proceedings conference paper supplement (https://aclanthology.org/2026.semeval-1.429)

Distance (in Spearman Rho Space)

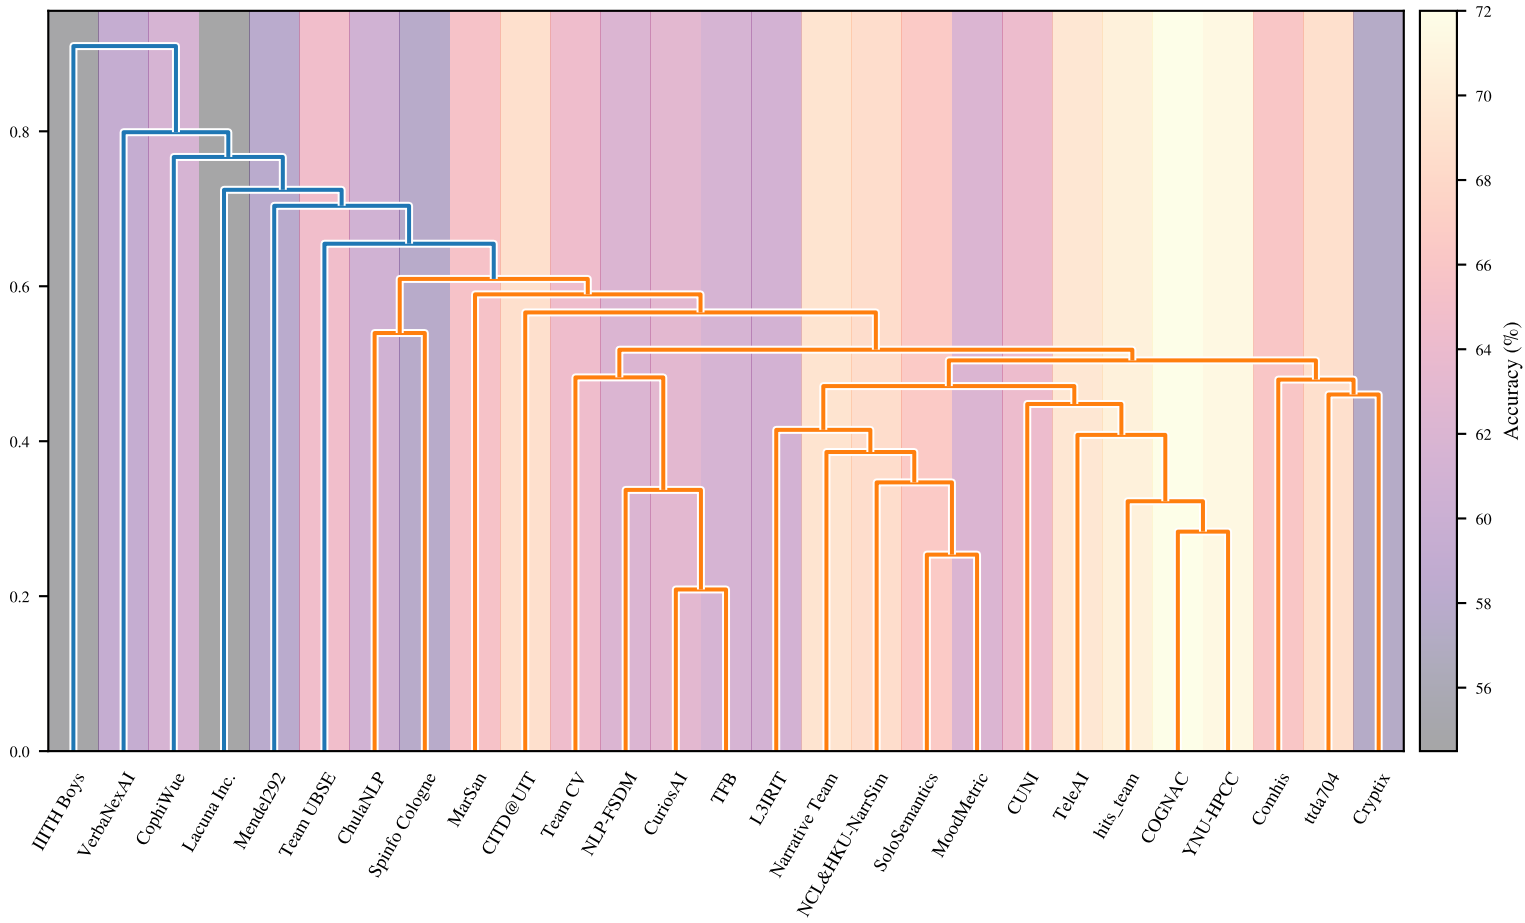

Supplement: SupplementaryMaterial [file dendrogram_spearman_with_accuracy.pdf › img/dendrogram_spearman_with_accuracy.pdf]

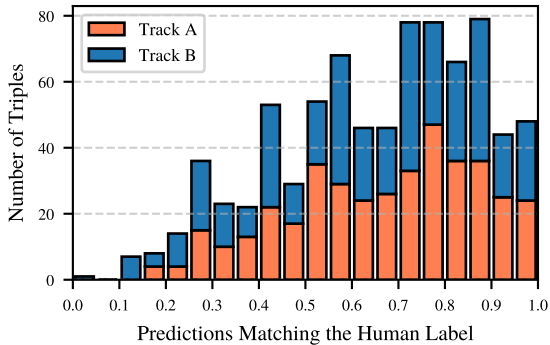

Supplement: SupplementaryMaterial [file difficulty_distribution.pdf › img/difficulty_distribution.pdf]

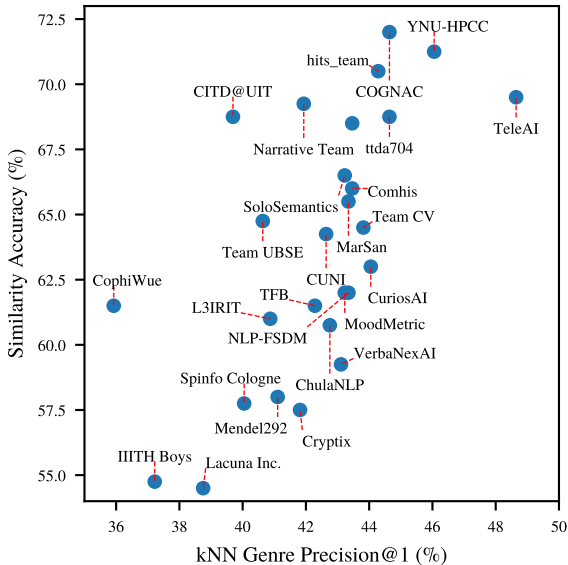

Supplement: SupplementaryMaterial [file genre_accuracy_correlation.pdf › img/genre_accuracy_correlation.pdf]

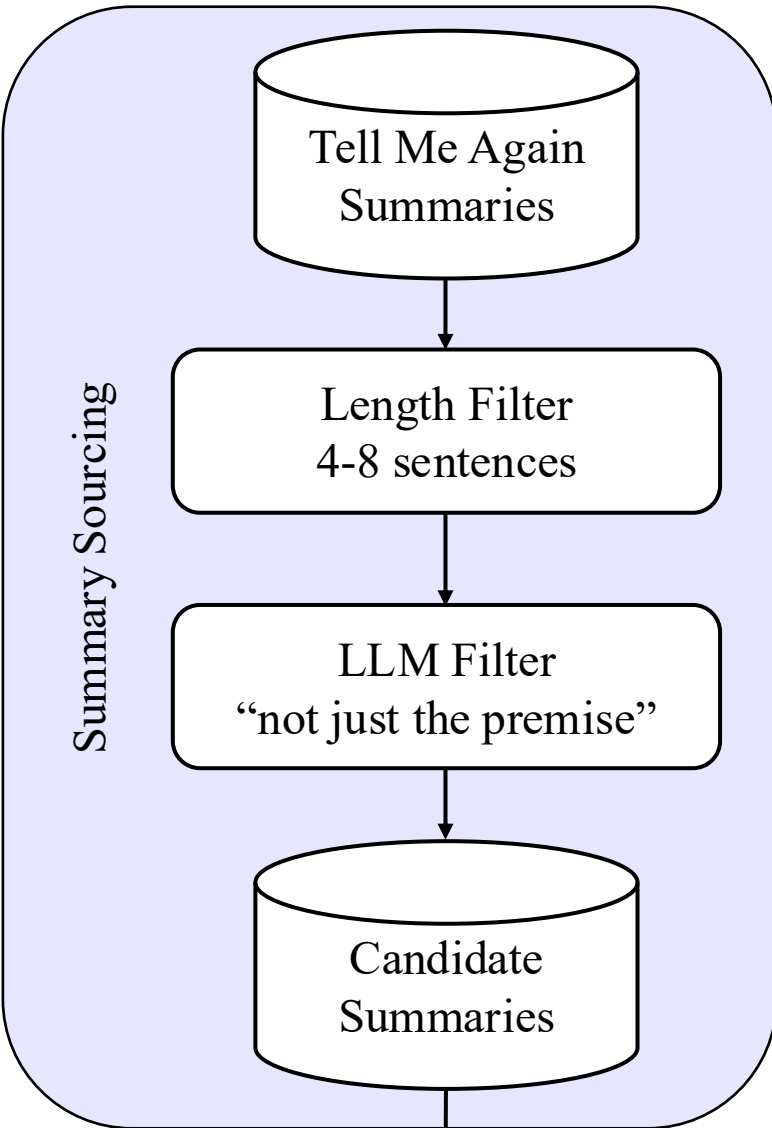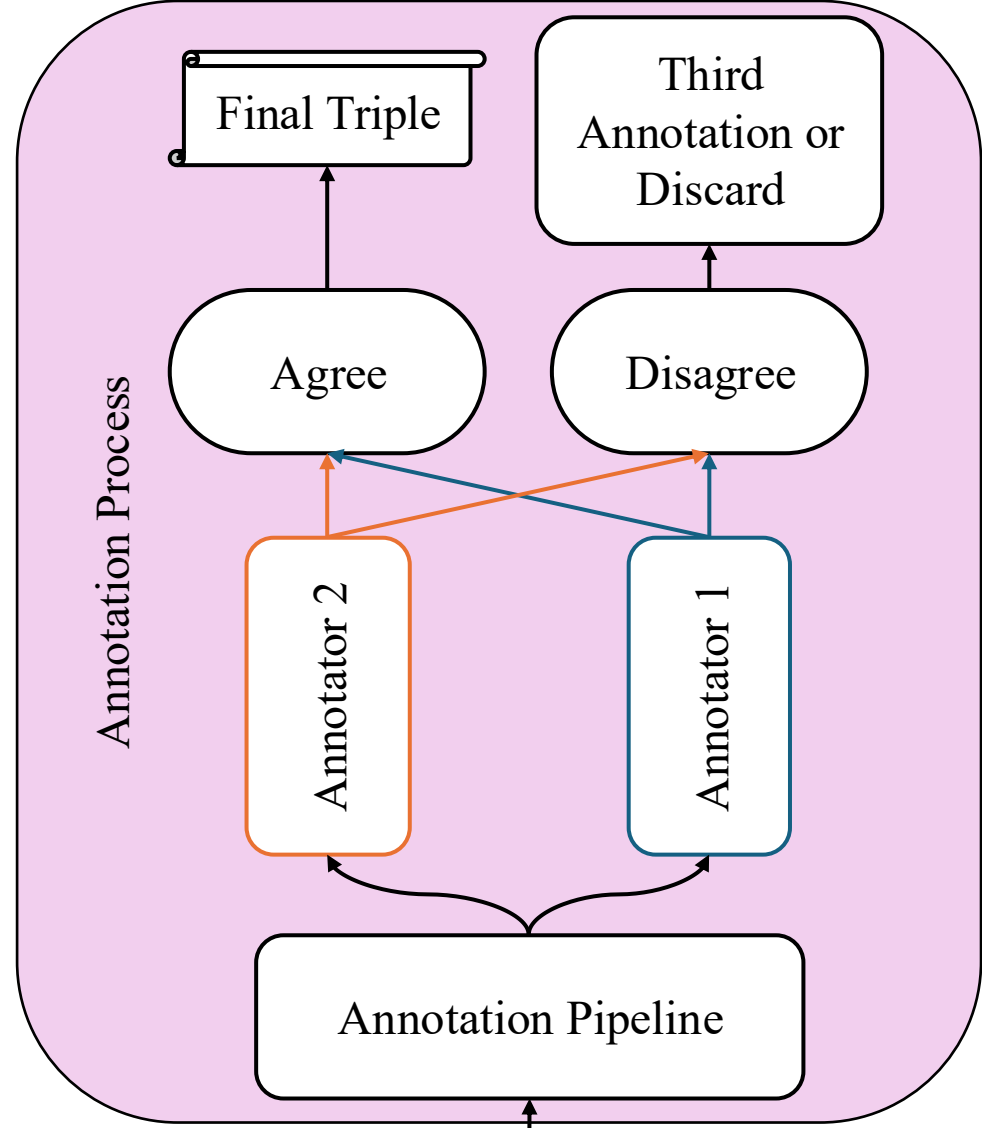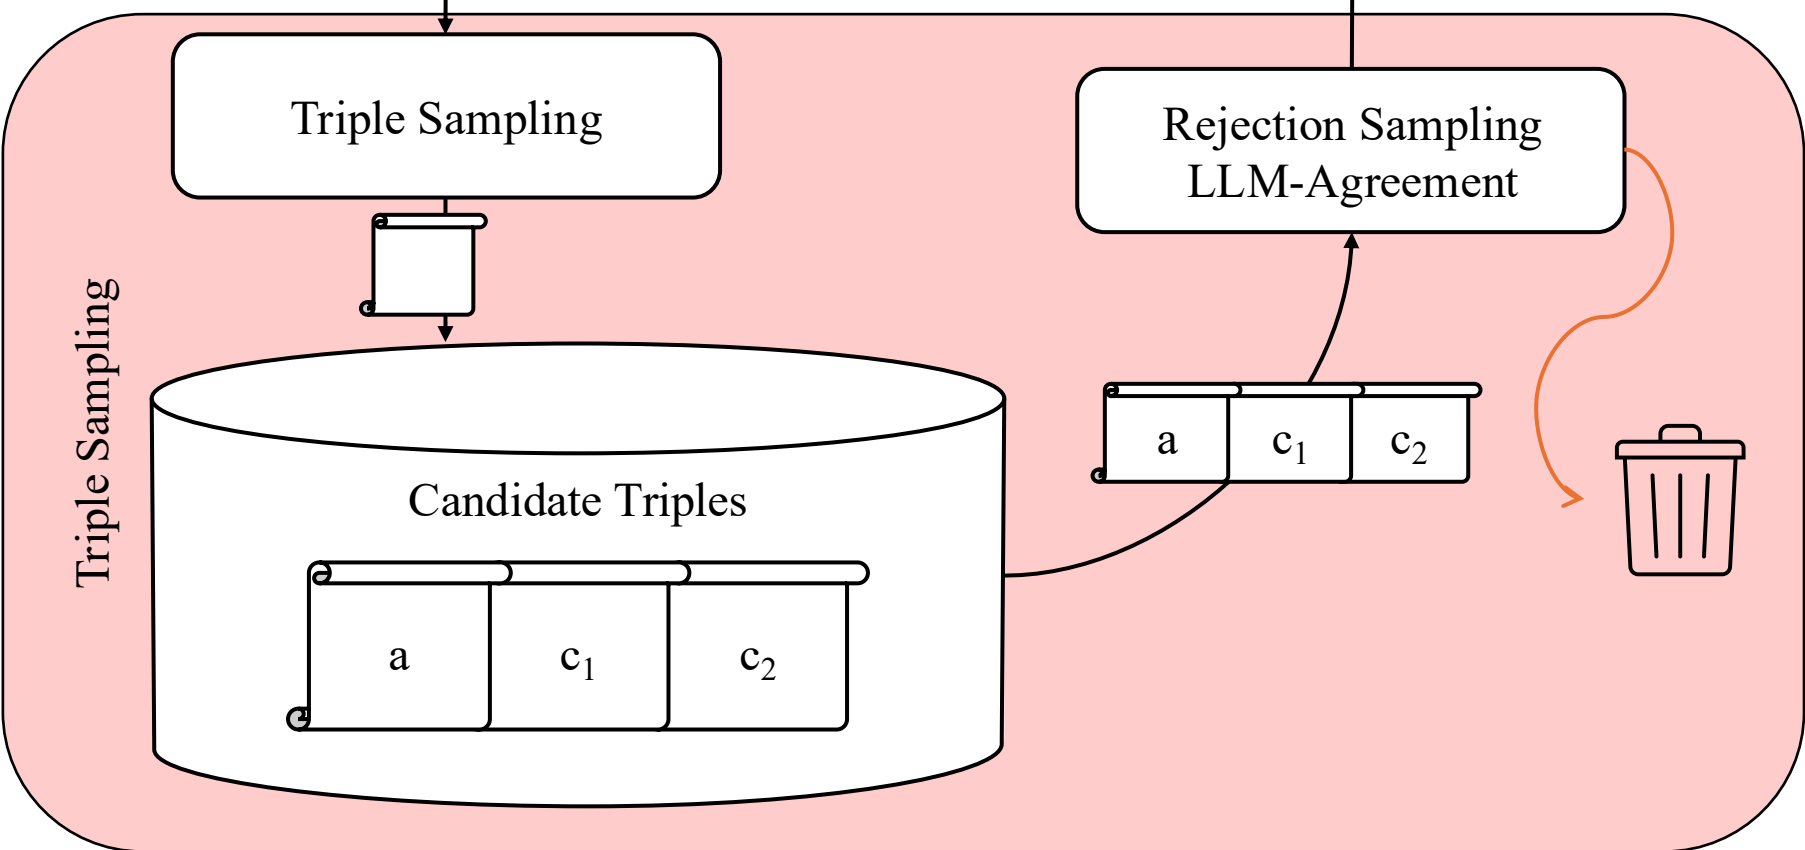

Supplement: SupplementaryMaterial [file sampling-flow.pdf › img/sampling-flow.pdf]
